# Supplementary material for: Identification of Differentially Methylated CpG Sites in Fibroblasts from Keloid Scars
Source: PubMed Central journal article supplement (PMC7400180; doi:10.3390/biomedicines8070181), 2020-06-28
Supplement: biomedicines-08-00181-s001.pdf [file biomedicines-08-00181-s001.pdf]

**Table S1.** The top 100 CpG sites and the associated genes.

| CpG        | Chr. <sup>1</sup> | Gene                | Region       | CpG Island | Mean $\beta$ value (CF) <sup>2</sup> | Mean $\beta$ value (KF) <sup>2</sup> | Mean $\beta$ value diff (KF-CF) <sup>2</sup> | mean.quot. (log2) <sup>3</sup> | FDR <sup>4</sup> | Combined rank score | Methylation pattern |
|------------|-------------------|---------------------|--------------|------------|--------------------------------------|--------------------------------------|----------------------------------------------|--------------------------------|------------------|---------------------|---------------------|
| cg11963436 | chr10             | TNKS2               | Body         | NA         | 0.0655                               | 0.5151                               | 0.4496                                       | 2.7984                         | 2.32E-10         | 180                 | Hypermethylation    |
| cg04294190 | chrX              | FAM45B              | Body         | NA         | 0.0602                               | 0.4418                               | 0.3816                                       | 2.6854                         | 8.20E-09         | 325                 | Hypermethylation    |
| cg05396017 | chrX              | NA                  | NA           | N_Shore    | 0.1169                               | 0.7131                               | 0.5962                                       | 2.5103                         | 5.54E-10         | 464                 | Hypermethylation    |
| cg12050434 | chr12             | NA                  | NA           | NA         | 0.1124                               | 0.5722                               | 0.4597                                       | 2.2494                         | 2.32E-10         | 912                 | Hypermethylation    |
| cg21581312 | chr15             | LOC723972           | TSS200       | NA         | 0.1569                               | 0.7604                               | 0.6035                                       | 2.2067                         | 7.98E-10         | 1014                | Hypermethylation    |
| cg24958366 | chr17             | NA                  | NA           | NA         | 0.1492                               | 0.6536                               | 0.5044                                       | 2.0594                         | 2.35E-10         | 1352                | Hypermethylation    |
| cg25365518 | chr17             | GAS7                | Body         | NA         | 0.1178                               | 0.4692                               | 0.3514                                       | 1.9064                         | 1.58E-08         | 1775                | Hypermethylation    |
| cg08700284 | chr7              | RHBDD2              | TSS200       | Island     | 0.1058                               | 0.4053                               | 0.2995                                       | 1.8426                         | 2.28E-09         | 1992                | Hypermethylation    |
| cg04657325 | chr4              | NA                  | NA           | NA         | 0.4013                               | 0.1127                               | -0.2887                                      | -1.7456                        | 6.10E-08         | 2378                | Hypomethylation     |
| cg24400517 | chr7              | LOC100134229;JHDM1D | TSS1500;Body | Island     | 0.0945                               | 0.3725                               | 0.2780                                       | 1.8718                         | 2.23E-07         | 2506                | Hypermethylation    |
| cg21285133 | chr1              | ANP32E              | TSS1500      | S_Shore    | 0.1292                               | 0.4416                               | 0.3124                                       | 1.6976                         | 6.09E-08         | 2558                | Hypermethylation    |
| cg19713980 | chr17             | CAMKK1              | 5'UTR        | Island     | 0.0396                               | 0.3163                               | 0.2766                                       | 2.7164                         | 1.83E-07         | 2616                | Hypermethylation    |
| cg00555695 | chr8              | PVT1                | Body         | NA         | 0.1373                               | 0.4601                               | 0.3228                                       | 1.6746                         | 2.31E-07         | 2645                | Hypermethylation    |
| cg00429618 | chr9              | ZNF322B             | TSS1500      | Island     | 0.0943                               | 0.3699                               | 0.2756                                       | 1.8654                         | 2.74E-07         | 2680                | Hypermethylation    |
| cg01852095 | chr2              | LRP1B               | Body         | NA         | 0.2005                               | 0.6565                               | 0.4560                                       | 1.6630                         | 1.97E-08         | 2695                | Hypermethylation    |
| cg00563768 | chr17             | TAF15               | 3'UTR        | NA         | 0.2326                               | 0.7486                               | 0.5160                                       | 1.6449                         | 1.17E-08         | 2793                | Hypermethylation    |
| cg25444615 | chr19             | NA                  | NA           | NA         | 0.1381                               | 0.4411                               | 0.3030                                       | 1.6067                         | 6.96E-08         | 2986                | Hypermethylation    |
| cg01262337 | chr3              | TKT                 | TSS200       | Island     | 0.1459                               | 0.4642                               | 0.3183                                       | 1.6052                         | 3.09E-07         | 2995                | Hypermethylation    |
| cg24449629 | chr19             | NA                  | NA           | S_Shelf    | 0.0646                               | 0.3355                               | 0.2709                                       | 2.2123                         | 1.68E-07         | 3024                | Hypermethylation    |
| cg21152376 | chr3              | NA                  | NA           | Island     | 0.3971                               | 0.1245                               | -0.2726                                      | -1.5978                        | 5.18E-10         | 3035                | Hypomethylation     |

Table S1. Continued.

| CpG        | Chr. <sup>1</sup> | Gene             | Region          | CpG Island | Mean $\beta$ value (CF) <sup>2</sup> | Mean $\beta$ value (KF) <sup>2</sup> | Mean $\beta$ value diff (KF-CF) <sup>2</sup> | mean.quot. (log2) <sup>3</sup> | FDR <sup>4</sup> | Combined rank score | Methylation pattern |
|------------|-------------------|------------------|-----------------|------------|--------------------------------------|--------------------------------------|----------------------------------------------|--------------------------------|------------------|---------------------|---------------------|
| cg17824939 | chr12             | C12orf50         | 5'UTR           | NA         | 0.2113                               | 0.6515                               | 0.4401                                       | 1.5794                         | 1.77E-07         | 3114                | Hypermethylation    |
| cg09234578 | chrX              | NHS              | Body            | Island     | 0.0607                               | 0.3282                               | 0.2675                                       | 2.2580                         | 2.40E-08         | 3332                | Hypermethylation    |
| cg01082910 | chr10             | NA               | NA              | N_Shore    | 0.1774                               | 0.5335                               | 0.3561                                       | 1.5358                         | 3.16E-07         | 3365                | Hypermethylation    |
| cg17461271 | chr1              | NA               | NA              | NA         | 0.2997                               | 0.8836                               | 0.5839                                       | 1.5287                         | 1.42E-10         | 3409                | Hypermethylation    |
| cg05899741 | chr4              | NA               | NA              | NA         | 0.1434                               | 0.4298                               | 0.2863                                       | 1.5191                         | 9.81E-09         | 3471                | Hypermethylation    |
| cg27248073 | chr17             | FAM64A           | TSS200          | Island     | 0.4570                               | 0.1573                               | -0.2997                                      | -1.4809                        | 2.30E-08         | 3754                | Hypomethylation     |
| cg11450715 | chr2              | NA               | NA              | Island     | 0.5710                               | 0.2020                               | -0.3690                                      | -1.4545                        | 3.96E-09         | 3921                | Hypomethylation     |
| cg16900255 | chr15             | C15orf59         | Body            | NA         | 0.2710                               | 0.7519                               | 0.4809                                       | 1.4390                         | 2.83E-08         | 4053                | Hypermethylation    |
| cg24132580 | chr4              | MARCH1;ANP32C    | 5'UTR;TSS200    | NA         | 0.0661                               | 0.3252                               | 0.2591                                       | 2.1388                         | 1.54E-07         | 4205                | Hypermethylation    |
| cg07441824 | chrX              | ZCCHC16          | 5'UTR           | Island     | 0.2428                               | 0.6654                               | 0.4225                                       | 1.4175                         | 8.75E-08         | 4226                | Hypermethylation    |
| cg11792281 | chr17             | NLK              | Body            | NA         | 0.3148                               | 0.8473                               | 0.5326                                       | 1.4005                         | 3.27E-08         | 4383                | Hypermethylation    |
| cg10044516 | chrX              | NA               | NA              | Island     | 0.2873                               | 0.7638                               | 0.4765                                       | 1.3799                         | 5.14E-09         | 4590                | Hypermethylation    |
| cg10818284 | chrX              | SYP              | Body            | Island     | 0.0550                               | 0.4606                               | 0.4056                                       | 2.8559                         | 6.52E-07         | 4879                | Hypermethylation    |
| cg02449698 | chr1              | EFCAB7;DLEU2L    | Body;TSS200     | NA         | 0.3210                               | 0.8321                               | 0.5111                                       | 1.3472                         | 1.42E-10         | 4940                | Hypermethylation    |
| cg16752652 | chr5              | SLC12A2;FLJ33630 | 1stExon;TSS1500 | Island     | 0.1014                               | 0.3526                               | 0.2513                                       | 1.7030                         | 1.09E-09         | 5168                | Hypermethylation    |
| cg14018420 | chr1              | NBPF3            | TSS1500         | Island     | 0.6898                               | 0.2696                               | -0.4201                                      | -1.3233                        | 2.99E-09         | 5193                | Hypomethylation     |
| cg19541697 | chr2              | ASXL2            | Body            | NA         | 0.2586                               | 0.6534                               | 0.3948                                       | 1.3046                         | 9.43E-08         | 5396                | Hypermethylation    |
| cg14502625 | chr5              | NA               | NA              | NA         | 0.2293                               | 0.5852                               | 0.3559                                       | 1.3146                         | 7.83E-07         | 5524                | Hypermethylation    |
| cg18803079 | chr1              | EFCAB7;DLEU2L    | Body;TSS200     | NA         | 0.3768                               | 0.9332                               | 0.5564                                       | 1.2859                         | 6.38E-14         | 5653                | Hypermethylation    |
| cg22805491 | chr14             | NA               | NA              | NA         | 0.3643                               | 0.9019                               | 0.5376                                       | 1.2846                         | 1.85E-10         | 5673                | Hypermethylation    |
| cg20673919 | chr11             | PATE4            | TSS1500         | NA         | 0.1926                               | 0.5101                               | 0.3175                                       | 1.3603                         | 8.15E-07         | 5735                | Hypermethylation    |

Table S1. Continued.

| CpG        | Chr. <sup>1</sup> | Gene         | Region       | CpG Island | Mean $\beta$ value (CF) <sup>2</sup> | Mean $\beta$ value (KF) <sup>2</sup> | Mean $\beta$ value diff (KF-CF) <sup>2</sup> | mean.quot. (log2) <sup>3</sup> | FDR <sup>4</sup> | Combined rank score | Methylation pattern |
|------------|-------------------|--------------|--------------|------------|--------------------------------------|--------------------------------------|----------------------------------------------|--------------------------------|------------------|---------------------|---------------------|
| cg19933320 | chr7              | ZNF107       | TSS1500      | N_Shore    | 0.2004                               | 0.4996                               | 0.2992                                       | 1.2764                         | 5.44E-07         | 5788                | Hypermethylation    |
| cg24568548 | chr11             | NA           | NA           | S_Shore    | 0.3454                               | 0.8471                               | 0.5017                                       | 1.2700                         | 3.51E-09         | 5878                | Hypermethylation    |
| cg16435601 | chr17             | BPTF         | 1stExon      | S_Shore    | 0.5014                               | 0.2028                               | -0.2986                                      | -1.2649                        | 1.27E-07         | 5936                | Hypomethylation     |
| cg22336806 | chr6              | SERPINB9     | TSS200       | Island     | 0.0462                               | 0.2922                               | 0.2460                                       | 2.4256                         | 8.28E-07         | 5952                | Hypermethylation    |
| cg01426921 | chr9              | RMRP;CCDC107 | TSS1500;Body | Island     | 0.1968                               | 0.4865                               | 0.2897                                       | 1.2634                         | 2.47E-08         | 5958                | Hypermethylation    |
| cg07707039 | chr17             | COX11        | Body         | N_Shelf    | 0.2431                               | 0.5943                               | 0.3512                                       | 1.2553                         | 4.95E-07         | 6071                | Hypermethylation    |
| cg05001044 | chr1              | MIR1977      | TSS1500      | NA         | 0.3810                               | 0.1374                               | -0.2436                                      | -1.4075                        | 5.48E-09         | 6310                | Hypomethylation     |
| cg14559409 | chr10             | NA           | NA           | Island     | 0.2950                               | 0.7010                               | 0.4060                                       | 1.2211                         | 1.78E-07         | 6601                | Hypermethylation    |
| cg25034991 | chr10             | NA           | NA           | NA         | 0.1703                               | 0.7647                               | 0.5944                                       | 2.1036                         | 9.72E-07         | 6622                | Hypermethylation    |
| cg13116816 | chr7              | C7orf23      | Body         | NA         | 0.2398                               | 0.5690                               | 0.3291                                       | 1.2126                         | 4.40E-07         | 6749                | Hypermethylation    |
| cg10342490 | chr11             | GUCY1A2      | Body         | NA         | 0.3153                               | 0.7430                               | 0.4277                                       | 1.2108                         | 3.02E-09         | 6785                | Hypermethylation    |
| cg07967114 | chr12             | NA           | NA           | NA         | 0.3250                               | 0.7642                               | 0.4392                                       | 1.2086                         | 5.29E-09         | 6829                | Hypermethylation    |
| cg01070250 | chr1              | NA           | NA           | NA         | 0.3610                               | 0.1213                               | -0.2397                                      | -1.4987                        | 1.44E-09         | 6954                | Hypomethylation     |
| cg27556136 | chrX              | NCRNA00182   | Body         | Island     | 0.3770                               | 0.8789                               | 0.5019                                       | 1.1998                         | 3.15E-10         | 6987                | Hypermethylation    |
| cg05337192 | chr1              | NA           | NA           | NA         | 0.2140                               | 0.5020                               | 0.2880                                       | 1.1924                         | 4.81E-08         | 7122                | Hypermethylation    |
| cg22281935 | chr2              | NA           | NA           | S_Shelf    | 0.1861                               | 0.4344                               | 0.2483                                       | 1.1802                         | 1.09E-06         | 7362                | Hypermethylation    |
| cg09048334 | chr6              | NA           | NA           | Island     | 0.1428                               | 0.3780                               | 0.2352                                       | 1.3444                         | 1.47E-09         | 7754                | Hypermethylation    |
| cg27069616 | chr7              | NA           | NA           | NA         | 0.2762                               | 0.6266                               | 0.3504                                       | 1.1535                         | 1.06E-06         | 7865                | Hypermethylation    |
| cg06493963 | chr7              | TFEC         | Body         | NA         | 0.2841                               | 0.6435                               | 0.3593                                       | 1.1516                         | 8.81E-07         | 7897                | Hypermethylation    |
| cg00090782 | chr10             | NA           | NA           | Island     | 0.4192                               | 0.1580                               | -0.2612                                      | -1.3536                        | 1.23E-06         | 7908                | Hypomethylation     |
| cg27212541 | chr3              | DAG1         | TSS200       | Island     | 0.1711                               | 0.5155                               | 0.3444                                       | 1.5366                         | 1.24E-06         | 7990                | Hypermethylation    |

Table S1. Continued.

| CpG        | Chr. <sup>1</sup> | Gene               | Region    | CpG Island | Mean $\beta$ value (CF) <sup>2</sup> | Mean $\beta$ value (KF) <sup>2</sup> | Mean $\beta$ value diff (KF-CF) <sup>2</sup> | mean.quot. (log2) <sup>3</sup> | FDR <sup>4</sup> | Combined rank score | Methylation pattern |
|------------|-------------------|--------------------|-----------|------------|--------------------------------------|--------------------------------------|----------------------------------------------|--------------------------------|------------------|---------------------|---------------------|
| cg12739584 | chr6              | NA                 | NA        | N_Shore    | 0.0444                               | 0.5345                               | 0.4902                                       | 3.3243                         | 1.29E-06         | 8185                | Hypermethylation    |
| cg01385356 | chr17             | USP36              | TSS1500   | Island     | 0.1839                               | 0.4167                               | 0.2328                                       | 1.1377                         | 3.68E-08         | 8214                | Hypermethylation    |
| cg19463471 | chr19             | C19orf66           | Body      | Island     | 0.1117                               | 0.3441                               | 0.2324                                       | 1.5409                         | 1.13E-06         | 8244                | Hypermethylation    |
| cg12977827 | chr5              | BRD8               | Body      | N_Shelf    | 0.2339                               | 0.5255                               | 0.2916                                       | 1.1346                         | 8.29E-07         | 8288                | Hypermethylation    |
| cg14115740 | chr9              | FANCC              | 5'UTR     | Island     | 0.3679                               | 0.8156                               | 0.4477                                       | 1.1275                         | 2.06E-08         | 8459                | Hypermethylation    |
| cg05294909 | chrX              | SCML1              | 5'UTR     | Island     | 0.0781                               | 0.3089                               | 0.2309                                       | 1.8567                         | 1.04E-07         | 8547                | Hypermethylation    |
| cg22502448 | chr3              | ZNF167             | Body      | Island     | 0.3059                               | 0.6776                               | 0.3717                                       | 1.1221                         | 8.19E-07         | 8585                | Hypermethylation    |
| cg05893889 | chr2              | NA                 | NA        | NA         | 0.3429                               | 0.7539                               | 0.4109                                       | 1.1139                         | 2.01E-09         | 8745                | Hypermethylation    |
| cg13876481 | chr6              | C6orf103;LOC729176 | Body;Body | NA         | 0.1258                               | 0.3551                               | 0.2293                                       | 1.4270                         | 1.25E-07         | 8845                | Hypermethylation    |
| cg14188774 | chr7              | NA                 | NA        | NA         | 0.0717                               | 0.3282                               | 0.2565                                       | 2.0495                         | 1.47E-06         | 8976                | Hypermethylation    |
| cg01381374 | chr7              | NA                 | NA        | NA         | 0.3198                               | 0.6969                               | 0.3771                                       | 1.1000                         | 1.44E-07         | 9060                | Hypermethylation    |
| cg18700146 | chr3              | GRAMD1C            | Body      | N_Shore    | 0.3279                               | 0.7108                               | 0.3829                                       | 1.0929                         | 7.03E-09         | 9227                | Hypermethylation    |
| cg03243683 | chr6              | HSPA1L             | Body      | N_Shelf    | 0.3680                               | 0.7957                               | 0.4277                                       | 1.0919                         | 1.32E-09         | 9248                | Hypermethylation    |
| cg18458431 | chr19             | LPAR2              | TSS200    | Island     | 0.0800                               | 0.3064                               | 0.2264                                       | 1.8137                         | 4.00E-08         | 9446                | Hypermethylation    |
| cg24159721 | chr1              | NA                 | NA        | NA         | 0.3646                               | 0.1384                               | -0.2262                                      | -1.3359                        | 9.44E-09         | 9491                | Hypomethylation     |
| cg13802966 | chr11             | CASP1              | Body      | NA         | 0.4001                               | 0.1742                               | -0.2259                                      | -1.1549                        | 1.86E-08         | 9542                | Hypomethylation     |
| cg26829098 | chr1              | NA                 | NA        | NA         | 0.2105                               | 0.4554                               | 0.2449                                       | 1.0776                         | 1.30E-06         | 9623                | Hypermethylation    |
| cg25724260 | chr7              | NA                 | NA        | NA         | 0.0839                               | 0.3384                               | 0.2545                                       | 1.8910                         | 1.64E-06         | 9677                | Hypermethylation    |
| cg14394011 | chr17             | MYH10              | Body      | NA         | 0.3135                               | 0.6719                               | 0.3584                                       | 1.0757                         | 1.26E-07         | 9690                | Hypermethylation    |
| cg26868250 | chr11             | PSMA1              | Body      | NA         | 0.2845                               | 0.6100                               | 0.3254                                       | 1.0737                         | 1.29E-08         | 9738                | Hypermethylation    |
| cg05062854 | chr22             | NA                 | NA        | N_Shelf    | 0.2440                               | 0.5240                               | 0.2801                                       | 1.0723                         | 2.30E-08         | 9778                | Hypermethylation    |

Table S1. Continued.

| CpG        | Chr. <sup>1</sup> | Gene               | Region             | CpG Island | Mean $\beta$ value (CF) <sup>2</sup> | Mean $\beta$ value (KF) <sup>2</sup> | Mean $\beta$ value diff (KF-CF) <sup>2</sup> | mean.quot. (log2) <sup>3</sup> | FDR <sup>4</sup> | Combined rank score | Methylation pattern |
|------------|-------------------|--------------------|--------------------|------------|--------------------------------------|--------------------------------------|----------------------------------------------|--------------------------------|------------------|---------------------|---------------------|
| cg08472559 | chr10             | FANK1              | TSS200             | Island     | 0.3696                               | 0.1453                               | -0.2244                                      | -1.2897                        | 1.89E-08         | 9863                | Hypomethylation     |
| cg08941173 | chr11             | PKNOX2             | 5'UTR              | Island     | 0.3994                               | 0.1755                               | -0.2240                                      | -1.1423                        | 1.70E-08         | 9947                | Hypomethylation     |
| cg23596249 | chr4              | MARCH1;            | 5'UTR              | Island     | 0.2972                               | 0.6322                               | 0.3351                                       | 1.0641                         | 1.41E-07         | 10002               | Hypermethylation    |
| cg05041728 | chrX              | ZCCHC16            | 5'UTR              | Island     | 0.4125                               | 0.8724                               | 0.4599                                       | 1.0625                         | 2.19E-09         | 10058               | Hypermethylation    |
| cg21036194 | chr5              | SNCAIP             | Body               | NA         | 0.4592                               | 0.9687                               | 0.5095                                       | 1.0605                         | 1.40E-06         | 10110               | Hypermethylation    |
| cg24776295 | chrX              | NA                 | NA                 | N_Shore    | 0.2850                               | 0.6046                               | 0.3196                                       | 1.0590                         | 1.53E-07         | 10142               | Hypermethylation    |
| cg24232869 | chr12             | SENP1              | Body               | NA         | 0.2656                               | 0.5630                               | 0.2974                                       | 1.0561                         | 4.99E-07         | 10211               | Hypermethylation    |
| cg15792688 | chr4              | ZNF718             | Body               | Island     | 0.4204                               | 0.1979                               | -0.2225                                      | -1.0500                        | 3.79E-07         | 10382               | Hypomethylation     |
| cg23113715 | chr22             | NA                 | NA                 | Island     | 0.4407                               | 0.2079                               | -0.2328                                      | -1.0486                        | 9.01E-08         | 10414               | Hypomethylation     |
| cg15732422 | chr12             | CASC1              | Body               | N_Shelf    | 0.3092                               | 0.6498                               | 0.3406                                       | 1.0475                         | 4.67E-09         | 10458               | Hypermethylation    |
| cg07158881 | chr17             | NA                 | NA                 | N_Shelf    | 0.3474                               | 0.1258                               | -0.2216                                      | -1.3958                        | 4.06E-07         | 10491               | Hypomethylation     |
| cg14094333 | chr4              | KLF3;KLF3;FLJ13197 | 1stExon;5'UTR;Body | Island     | 0.2901                               | 0.0687                               | -0.2215                                      | -1.9315                        | 1.85E-10         | 10520               | Hypomethylation     |
| cg14222140 | chr1              | C1orf201           | Body               | NA         | 0.2863                               | 0.6006                               | 0.3143                                       | 1.0433                         | 3.16E-07         | 10580               | Hypermethylation    |
| cg00645010 | chr1              | MIR1977            | TSS1500            | NA         | 0.2678                               | 0.0467                               | -0.2211                                      | -2.2918                        | 2.99E-09         | 10601               | Hypomethylation     |
| cg26771998 | chr10             | BMS1P4             | TSS200             | Island     | 0.3560                               | 0.1353                               | -0.2207                                      | -1.3326                        | 4.69E-09         | 10690               | Hypomethylation     |
| cg24376286 | chr2              | NA                 | NA                 | NA         | 0.3199                               | 0.6654                               | 0.3454                                       | 1.0334                         | 3.58E-09         | 10873               | Hypermethylation    |
| cg00609367 | chr10             | NA                 | NA                 | NA         | 0.2464                               | 0.5126                               | 0.2662                                       | 1.0275                         | 1.72E-06         | 11038               | Hypermethylation    |

<sup>1</sup> Chr: chromosome.

<sup>2</sup> Mean  $\beta$  value: mean methylation levels across all sites in a region; CF: control fibroblast; KF: keloid fibroblast (KF).

<sup>3</sup> mean.mean.quot.log2: mean quotient in means across all sites in a region.

<sup>4</sup> FDR: False discovery rate.
